# Supplementary material
Source: PubMed Central journal article supplement (PMC3157556)
Supplement: NIHMS309498-supplement-1.pdf [file NIHMS309498-supplement-1.pdf]

**SUPPLEMENTAL MATERIAL**

**CIRCCVG/2011/959866**

Molecular Genetic and Functional Characterization Implicate Muscle-Restricted  
Coiled-Coil Gene (*MURC*) As a Causal Gene For Familial Dilated Cardiomyopathy

Gabriela Rodriguez, MD, et al.

**TABLE 1**

---

**A. Sequence of Oligonucleotide Primers Used for Sequencing of *MURC* Exons**

**(Genomic DNA Sequence Source: NC\_000009.11, GI:224589821)**

**Exon 1 (nucleotides 5- 586)**

Forward: 5'CCTGTTGCCTGTTATCAAGCTGAC3'

Reverse: 5'GACACTGGAAACCTCTGATATGAC3'

**Exon 2 - Fragment 1 (nucleotides 7637 - 8058)**

Forward: 5'CATGGCCAGAAGGTAAAAGAGCTG3'

Reverse: 5'CCTGACTGTCTCAGCCTCTCTC3'

**Exon 2 - Fragment 2 (nucleotides 7930 - 8475)**

Forward: 5'GACACGGCAGAATCTTGACAAG3'

Reverse: 5'CATGGCACAGAAATGTAGACGAC3'

---

**B. Sequence of Oligonucleotide Primers Used for Mutagenesis**

**p.N128K**

Forward: 5'GTCAAGCAAGAGGAAATAATGAAGAAAAAGAAATTCGCGTGG3'

Reverse: 5'-CCACGCGGAATTTCTTTTTCTTCATTATTTCTCTTGCTTGAC3'

**p.R140W**

Forward: 5'-CAGGAGAAGTTTTGGTGTCCGACATCCCTGTCTG3'

Reverse: 5'-CAGACAGGGATGTCGGACACCAAAACTTCTCCTG3'

**p.L153P**

Forward: 5'-GTCTGTTGTTAAAGACAGAAACCCACTGAGAACCAAGAAGAGG3'

Reverse: 5'-CCTCTTCTTGTTCTCAGTTGGGTTTCTGTCTTTAACAACAGAC3'

**p.S307T**

Forward: 5'-GTCTCTGGGCCCCATCACTGAGCTCTACTCTG3'

Reverse: 5'-CAGAGTAGAGCTCAGTGGATGGGGCCCAGAGAC3'

**p.P324L**

Forward: 5'-GAACACGAGGCAGCCAGGCTGGTGTATCCTCCCCATGAAG3'

Reverse: 5'-CTTCATGGGGAGGATACACCAGCCTGGCTGCCTCGTGTTTC3'

**p.S364L**

Forward: 5'-GATTTAAAGCACTCATTGACTACAAAGACGATGACGAC3'

Reverse: 5'-GTCGTCATCGTCTTTGTAGTCCAATGAGTGCTTTAAATC3'

-----

### C. Sequence of Oligonucleotide Primers Used in qPCR

#### Rat atrial natriuretic peptide (ANP or *Nppa*)

Forward: 5'-ATACAGTGCGGTGTCCAACA-3'

Reverse: 5'-CGAGAGCACCTCCATCTCTC-3'

#### Rat brain natriuretic peptide (BNP or *Nppb*)

Forward: 5'-GGAAATGGCTCAGAGACAGC-3'

Reverse: 5'-CGATCCGGTCTATCTTCTGC-3'

#### Rat skeletal $\alpha$ -actin (*SkA* or *Acta1*)

Forward: 5'-CACGGCATTATCACCAACTG-3'

Reverse: 5'-CCGGAGGCATAGAGAGACAG-3'

#### Rat glyceraldehyde-3-phosphate dehydrogenase (*Gapdh*)

Forward: 5'-ATGGGAAGCTGGTCATCAAC-3'

Reverse: 5'-GTGGTTCACCCCATCACAA-3'

Online Supplementary Material

TABLE 2

Non-Synonymous Variants Identified in the Probands and Controls

| Variants                                                                |            | Controls  |     | DCM       |     | HCM      |     |
|-------------------------------------------------------------------------|------------|-----------|-----|-----------|-----|----------|-----|
|                                                                         |            | N=509     |     | N=383     |     | N=307    |     |
|                                                                         |            | AA        | C   | AA        | C   | AA       | C   |
|                                                                         |            | 316       | 193 | 179       | 204 | 49       | 258 |
| AA                                                                      | Nucleotide |           |     |           |     |          |     |
| p.S20T                                                                  | g. 149G>C  | 2         | 0   | 1         | 0   | 0        | 0   |
| p.S78L                                                                  | g.323C>T   | 13        | 0   | 6         | 1   | 2        | 0   |
| p.N81K                                                                  | g.333T>G   | 1         | 0   | 1         | 0   | 1        | 0   |
| p.R131H                                                                 | g.482G>A   | 1         | 2   | 2         | 1   | 0        | 0   |
| p.D163G                                                                 | g.7791A>G  | 9         | 0   | 4         | 0   | 1        | 0   |
| p.R231K                                                                 | g.7795G>A  | 2         | 0   | 0         | 0   | 1        | 0   |
| Total number of non-synonymous variants per group and ethnic background |            | 28        | 2   | 14        | 2   | 5        | 0   |
| Total number of non-synonymous variants per group                       |            | 30 (5.9%) |     | 16 (4.2%) |     | 5 (1.6%) |     |

The prevalence of these non-synonymous variants was not significantly different between the DCM probands and controls. Likewise, the mean and median ages of individuals with these rare non-synonymous variants in the control and the DCM groups were similar (mean:  $48.7 \pm 8.6$  vs.  $47.9 \pm 3.9$ , respectively,  $p=0.537$ ; median: 45 vs. 49 years; range: 22 to 81 vs. 23 to 72 years).

Online Supplementary Material

Table 3

Synonymous, non-coding and deletion variants identified in the study population

| Study Population |            | Total                                            | Control |     | DCM |     | HCM |     |
|------------------|------------|--------------------------------------------------|---------|-----|-----|-----|-----|-----|
|                  |            |                                                  | AA      | C   | AA  | C   | AA  | C   |
|                  |            | 1,199                                            | 316     | 193 | 179 | 204 | 49  | 258 |
| Nucleotide       | Amino acid | Number of Individuals with DNA Sequence variants |         |     |     |     |     |     |
|                  |            | 1,183                                            | 264     | 233 | 178 | 211 | 47  | 250 |
| g.34G>A          | Non-coding | 10                                               | 1       | 3   | 3   | 2   | 1   | 0   |
| g.34G>R          | Non-coding | 6                                                | 1       | 0   | 0   | 5   | 0   | 0   |
| g.79G>R          | Non-coding | 1                                                | 0       | 0   | 1   | 0   | 0   | 0   |
| g.147G>R         | p.S19S     | 5                                                | 2       | 0   | 2   | 0   | 1   | 0   |
| g.267G>R         | p.R59R     | 1                                                | 0       | 1   | 0   | 0   | 0   | 0   |
| g.339G>K         | p.G83G     | 1                                                | 0       | 0   | 0   | 1   | 0   | 0   |
| g.504C>M         | Non-coding | 11                                               | 4       | 0   | 7   | 0   | 0   | 0   |
| g.507G>R         | Non-coding | 2                                                | 0       | 0   | 1   | 0   | 1   | 0   |
| g.526T>Y         | Non-coding | 3                                                | 1       | 0   | 2   | 0   | 0   | 0   |
| g.540T>C         | Non-coding | 75                                               | 10      | 21  | 7   | 13  | 2   | 22  |
| g.540T>Y         | Non-coding | 361                                              | 96      | 75  | 43  | 63  | 10  | 74  |
| g.7729G>R        | p.P142P    | 1                                                | 0       | 0   | 0   | 0   | 1   | 0   |
| g.7822G>S        | p.S173S    | 1                                                | 0       | 0   | 0   | 0   | 0   | 1   |
| g.7873A>T        | p.S190S    | 1                                                | 0       | 0   | 1   | 0   | 0   | 0   |
| g.7873A>W        | p.S190S    | 81                                               | 26      | 8   | 25  | 5   | 6   | 11  |
| g.7918A>R        | p.E205E    | 3                                                | 2       | 0   | 1   | 0   | 0   | 0   |
| g.7981G>K        | p.V226V    | 1                                                | 0       | 0   | 1   | 0   | 0   | 0   |
| g.7987G>R        | p.P228P    | 1                                                | 0       | 0   | 1   | 0   | 0   | 0   |
| g.8005A>R        | p.L234L    | 5                                                | 0       | 1   | 0   | 1   | 0   | 3   |
| g.8008G>R        | p.R235R    | 6                                                | 0       | 2   | 0   | 1   | 0   | 3   |
| g.8017A>R        | p.G238G    | 1                                                | 0       | 1   | 0   | 0   | 0   | 0   |
| g.8203C>Y        | p.S300S    | 1                                                | 1       | 0   | 0   | 0   | 0   | 0   |
| g.8299G>A        | p.R332R    | 150                                              | 17      | 33  | 15  | 29  | 6   | 50  |
| g.8299G>R        | p.R332R    | 434                                              | 94      | 87  | 60  | 89  | 18  | 86  |
| g.8427A>R        | Non-coding | 3                                                | 0       | 1   | 0   | 2   | 0   | 0   |
| g.8444T>Y        | Non-coding | 18                                               | 9       | 0   | 8   | 0   | 1   | 0   |

# Online Figure 1

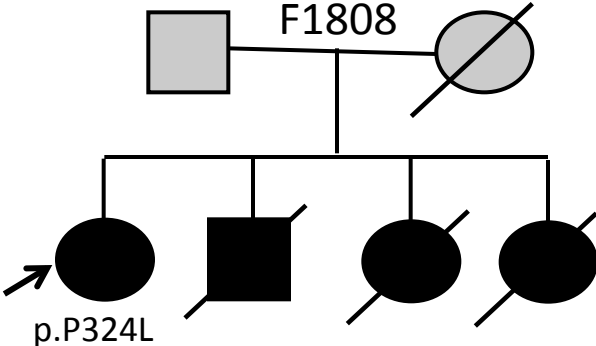

D9S180 231/233  
 D9S910 110/125  
 D9S176 151/153

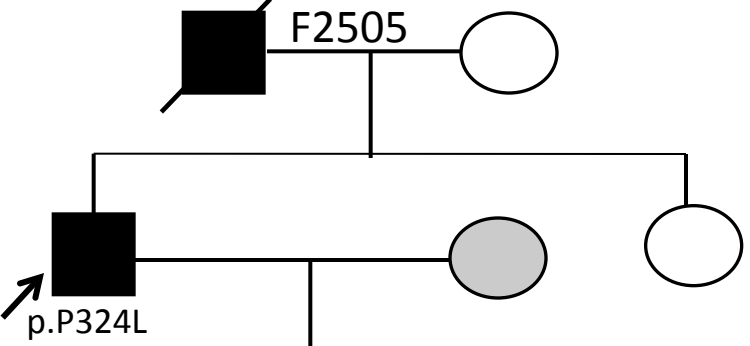

D9S180 235/235  
 D9S910 113/128  
 D9S176 131/135

p.P324P  
 D9S180 235/235  
 D9S910 110/113  
 D9S176 131/143

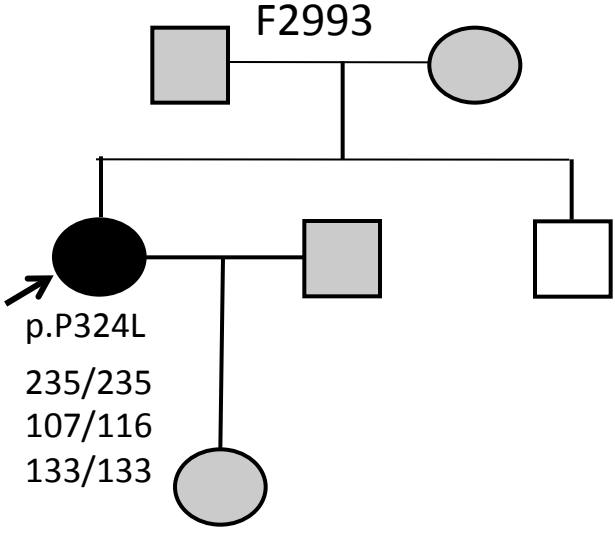

D9S180 235/235  
 D9S910 107/116  
 D9S176 133/133

Online Figure 2

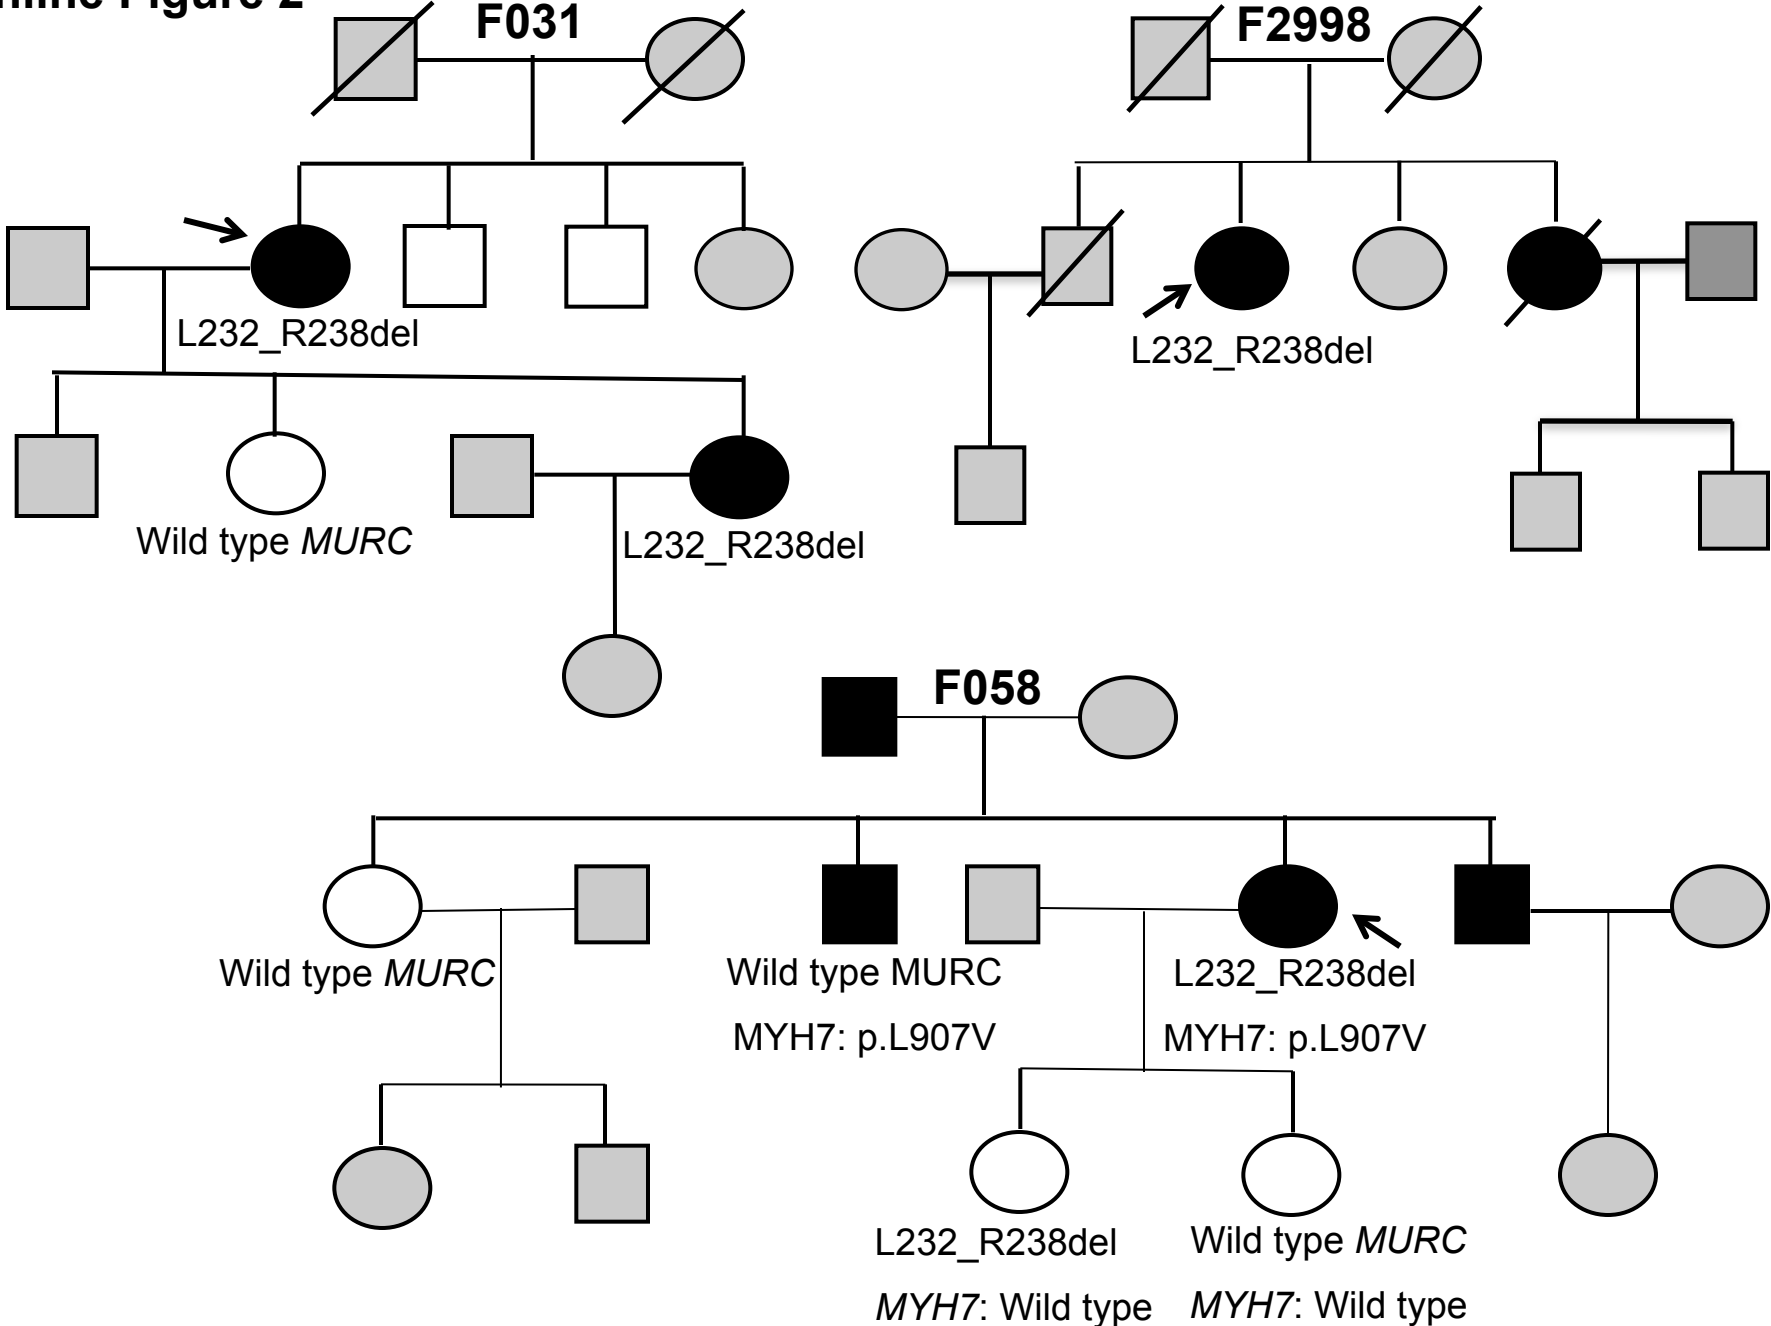



### Supplemental figure legend

**Supplemental Figure 1.** Genotypes of three probands with familial dilated cardiomyopathy and the p.P324L variant in *MURC* gene, who were typed for three short tandem repeat markers at the *MURC* locus. As shown the probands do not share a common locus haplotypes, indicating an independent origin of the p.P324L variants in three probands. Pedigree symbols are per convention (full circles and squares indicate affected females and males respectively. Empty circles and squares indicate normal females and males respectively. Grey symbols indicate individuals that were not phenotyped.

**Supplemental Figure 2.** Detection of the deletion variant (L232-R238del) in three families with hypertrophic cardiomyopathy. The deletion variant did not co-segregate with the phenotype in Family F058 as one clinically affected family member did not have the deletion mutation. A second mutation p.L907V in *MYH7* was detected in two affected members in this family. Symbols are as in Supplemental Figure 1.
